# Supplementary material
Source: ML conference proceedings conference paper supplement (https://openreview.net/forum?id=qy4uO5c_OB)
Supplement: supplementary_material [file attachment]

# SUPPLEMENT FOR “EFFICIENT BI-LEVEL OPTIMIZATION FOR NON-SMOOTH OPTIMIZATION”

**Anonymous authors**

Paper under double-blind review

## 1 CONVERGENCE ANALYSIS

In this section, we give the detailed convergence analysis. First, we give several definitions used in our analysis,

**Definition 1 (Tangent cone Clarke (1990).)** For a nonempty closed convex subset  $\mathcal{X}$  of  $\mathbb{R}^d$ , the tangent cone to  $\mathcal{W}$  at  $\mathbf{w} \in \mathcal{W}$ , denoted as  $\mathcal{T}_{\mathcal{W}}(\mathbf{w})$ , is the set consisting of all tangent vectors, where we call a vector  $\mathbf{v} \in \mathbb{R}^d$  a tangent vector to  $\mathcal{W}$  at  $\mathbf{w}$ , if there are a sequence  $\{\mathbf{w}^k\}$  in  $\mathcal{W}$  converging to  $\mathbf{w}$  and a sequence  $\{\tau^k\}$  of positive numbers converging to 0 such that

$$\mathbf{v} = \lim_{k \rightarrow \infty} \frac{\mathbf{w}^k - \mathbf{w}}{\tau^k}. \quad (1)$$

**Definition 2 (Normal cone Clarke (1990).)** We define the normal cone to  $\mathcal{W}$  at  $\mathbf{w}$  by polarity with  $\mathcal{T}_{\mathcal{W}}(\mathbf{w})$ :

$$\mathcal{N}_{\mathcal{W}}(\mathbf{w}) = \{\boldsymbol{\xi} \in \mathcal{W}^* : \langle \boldsymbol{\xi}, \mathbf{v} \rangle \leq 0 \text{ for all } \mathbf{v} \in \mathcal{T}_{\mathcal{W}}(\mathbf{w})\}, \quad (2)$$

where  $\mathcal{W}^*$  denotes the dual space of  $\mathcal{W}$ .

**Definition 3 (Clarke generalized directional derivative Clarke (1990).)** For the Lipschitz continuous function  $\phi$  over  $\mathcal{W}$ , the Clarke generalized directional derivative at  $\bar{\mathbf{w}}$  is defined as

$$\phi^\circ(\bar{\mathbf{w}}; \mathbf{v}; \mathcal{W}) = \limsup_{\substack{\mathbf{w} \mapsto \bar{\mathbf{w}}, \mathbf{w} \in \mathcal{W} \\ t \downarrow 0, \mathbf{y} + t\mathbf{v} \in \mathcal{W}}} \frac{\phi(\mathbf{w} + t\mathbf{v}) - \phi(\mathbf{w})}{t} \quad (3)$$

**Definition 4 (Interior set.)** The interior of a subset  $\mathcal{W}$ , denoted by  $\text{int}(\mathcal{W})$ , is defined as the set of all interior points of  $\mathcal{W}$ , where the point  $\mathbf{w}$  is said to a interior point if there exists an open ball centered at  $\mathbf{w}$  which is completely contained in  $\mathcal{W}$ .

To solve the non-Lipschitz continuous term in our original problem, for a fixed point  $\bar{\mathbf{w}} \in \mathcal{W}$ , we find out which  $h_i$  is not Lipschitz continuous at  $\mathbf{D}_i^T \bar{\mathbf{w}}$  and use a Lipschitz continuous function to replace it according to Bian & Chen (2017). Specifically, define the index set where  $h_i$  is not Lipschitz continuous at  $\mathbf{D}_i^T \bar{\mathbf{w}}$  as follows

$$\mathcal{I}_{\bar{\mathbf{w}}} = \{i \in \{1, 2, \dots, n\} : h_i \text{ is not Lipschitz continuous at } \mathbf{D}_i^T \bar{\mathbf{w}}\}, \quad (4)$$

and define a new function

$$h_i^{\bar{\mathbf{w}}}(\mathbf{D}_i^T \mathbf{w}) := \begin{cases} h_i(\mathbf{D}_i^T \mathbf{w}) & i \notin \mathcal{I}_{\bar{\mathbf{w}}} \\ h_i(\mathbf{D}_i^T \bar{\mathbf{w}}) & i \in \mathcal{I}_{\bar{\mathbf{w}}} \end{cases}, \quad (5)$$

which is Lipschitz continuous at  $\mathbf{D}_i^T \bar{\mathbf{w}}$ ,  $i = 1, 2, \dots, n$ . Then, we have a new function  $h_{\bar{\mathbf{w}}}(\mathbf{w}) := (h_1^{\bar{\mathbf{w}}}(\mathbf{D}_1^T \mathbf{w}), h_2^{\bar{\mathbf{w}}}(\mathbf{D}_2^T \mathbf{w}), \dots, h_n^{\bar{\mathbf{w}}}(\mathbf{D}_n^T \mathbf{w}))$ , which has the same value as  $h(\mathbf{w})$  but different property. For convenience, we define  $\phi_{\bar{\mathbf{w}}}(\mathbf{w}) = \varphi(h_{\bar{\mathbf{w}}}(\mathbf{w}))$  and  $\phi(\mathbf{w}) = \varphi(h(\mathbf{w}))$ . Besides, we define the vector set for the non-Lipschitz continuous index set as follows,

$$\mathcal{V}_{\bar{\mathbf{w}}} = \{\mathbf{v} : \mathbf{D}_i^T \mathbf{v} = \mathbf{0}, i \in \mathcal{I}_{\bar{\mathbf{w}}}\}, \quad (6)$$

which means that  $\mathbf{v}$  is perpendicular to all column vectors in  $\mathbf{D}_i$ ,  $i \in \mathcal{I}_{\bar{\mathbf{w}}}$ . Besides, we define  $\text{rint}(\mathcal{T}_{\mathcal{W}}(\mathbf{w})) = \text{int}(\mathcal{T}_{\mathcal{W}_1}(\mathbf{w})) \cap \mathcal{T}_{\mathcal{W}_2}(\mathbf{w})$ .

### 1.1 STATIONARY POINTS OF THE SINGLE-LEVEL PROBLEM

Now we prove that the conditions in definition 1 is necessary conditions for the stationary point of a certain single-level problem.

First, we give the exact single-level problem of the original non-smooth problem. Recently, W. Bian and X. Chen (2017) proposed a necessary condition of the general non-smooth non-convex, even non-Lipschitz problem, which is shown as the lower-level problem in our original bi-level problem. Specifically, if  $\mathbf{w}^*$  is the local minimizer and  $\text{rint}(\mathcal{T}_{\mathcal{W}}(\mathbf{w}^*)) \cap \mathcal{V}_{\mathbf{w}^*} \neq \emptyset$ , we have

$$\nabla_{\mathbf{w}}g(\mathbf{w}^*, \bar{\lambda})^T \mathbf{v} + \exp(\lambda_1)\phi^\circ(\mathbf{w}^*; \mathbf{v}; \mathcal{W}) \geq 0, \forall \mathbf{v} \in \mathcal{T}_{\mathcal{W}}(\mathbf{w}^*) \cap \mathcal{V}_{\mathbf{w}^*} \quad (7)$$

where  $\phi^\circ(\mathbf{w}^*; \mathbf{v}; \mathcal{W})$  denotes the Clarke generalized directional derivative of  $\varphi(h(\mathbf{w}))$  at the local minimizer  $\mathbf{w}^*$ . Then, we can replace the original non-smooth bi-level problem with above condition and obtain the following single-level problem,

$$\min_{\mathbf{w}, \lambda} f(\mathbf{w}, \lambda) \quad (8)$$

$$s.t. c(\mathbf{w}, \lambda) = \nabla_{\mathbf{w}}g(\mathbf{w}, \bar{\lambda})^T \mathbf{v} + \exp(\lambda_1)\phi^\circ(\mathbf{w}; \mathbf{v}; \mathcal{W}) \geq 0 \quad \forall \mathbf{v} \in \mathcal{T}_{\mathcal{W}}(\mathbf{w}) \cap \mathcal{V}_{\mathbf{w}}$$

if  $\text{rint}(\mathcal{T}_{\mathcal{W}}(\mathbf{w})) \cap \mathcal{V}_{\mathbf{w}} \neq \emptyset$  and  $\phi^\circ(\mathbf{w}; \mathbf{v}; \mathcal{W})$  denotes the Clarke generalized directional derivative of  $\varphi(h(\mathbf{w}))$  at point  $\mathbf{w}$ .

Based on our assumptions, we first give the following lemma.

**Lemma 1**  $c(\mathbf{w}, \lambda)$  is Lipschitz continuous on both  $\mathbf{w}$  and  $\lambda$ .

**Proof 1** We have

$$\begin{aligned} & |c(\mathbf{w}, \lambda) - c(\mathbf{w}', \lambda)| \\ &= |(\nabla_{\mathbf{w}}g(\mathbf{w}, \bar{\lambda})^T \mathbf{v} + \exp(\lambda_1)\phi^\circ(\mathbf{w}; \mathbf{v}; \mathcal{W})) - (\nabla_{\mathbf{w}}g(\mathbf{w}', \bar{\lambda})^T \mathbf{v} + \exp(\lambda_1)\phi^\circ(\mathbf{w}'; \mathbf{v}; \mathcal{W}))| \\ &\leq |\nabla_{\mathbf{w}}g(\mathbf{w}, \bar{\lambda})^T \mathbf{v} - \nabla_{\mathbf{w}}g(\mathbf{w}', \bar{\lambda})^T \mathbf{v}| + \exp(\lambda_1)|\phi^\circ(\mathbf{w}; \mathbf{v}; \mathcal{W}) - \phi^\circ(\mathbf{w}'; \mathbf{v}; \mathcal{W})| \end{aligned} \quad (9)$$

According to Proposition 2.1.1 in Clarke (1990) and  $g$  is  $L_g^w$ -Lipschitz continuous, where  $L_g^w$  is Lipschitz constant for  $\mathbf{w}$ , we have  $\nabla_{\mathbf{w}}g(\mathbf{w}, \bar{\lambda})^T \mathbf{v}$  is  $L_g^w$ -Lipschitz continuous. Besides, we have

$$\begin{aligned} & |\phi^\circ(\mathbf{w}; \mathbf{v}; \mathcal{W}) - \phi^\circ(\mathbf{w}'; \mathbf{v}; \mathcal{W})| \\ &= |\phi_{\bar{\mathbf{w}}}^\circ(\mathbf{w}; \mathbf{v}; \mathcal{W}) - \phi_{\bar{\mathbf{w}}}^\circ(\mathbf{w}'; \mathbf{v}; \mathcal{W})|. \end{aligned} \quad (10)$$

Since  $\phi_{\bar{\mathbf{w}}}$  is  $L_{\phi}^{\bar{\mathbf{w}}}$ -Lipschitz continuous, where  $L_{\phi}^{\bar{\mathbf{w}}}$  is the Lipschitz constant for  $\mathbf{w}$ , we have  $\phi_{\bar{\mathbf{w}}}^\circ$  is  $L_{\phi}^{\bar{\mathbf{w}}}$ -Lipschitz continuous according to Proposition 2.1.1 in Clarke (1990). Namely, we have

$$|\phi_{\bar{\mathbf{w}}}^\circ(\mathbf{w}; \mathbf{v}; \mathcal{W}) - \phi_{\bar{\mathbf{w}}}^\circ(\mathbf{w}'; \mathbf{v}; \mathcal{W})| \leq L_{\phi}^{\bar{\mathbf{w}}} \|\mathbf{w} - \mathbf{w}'\|_2 \quad (11)$$

Therefore, we have

$$|c(\mathbf{w}, \lambda) - c(\mathbf{w}', \lambda)| \leq (L_g^w + L_{\phi_{\bar{\mathbf{w}}}}^w) \|\mathbf{w} - \mathbf{w}'\|_2, \quad (12)$$

which means that  $c(\mathbf{w}, \lambda)$  is Lipschitz continuous on  $\mathbf{w}$ .

Then we prove  $c$  is Lipschitz continuous on  $\lambda$ . We have

$$\begin{aligned} & |c(\mathbf{w}, \lambda) - c(\mathbf{w}, \lambda')| \\ &= |(\nabla_{\mathbf{w}}g(\mathbf{w}, \bar{\lambda})^T \mathbf{v} + \exp(\lambda_1)\phi^\circ(\mathbf{w}; \mathbf{v}; \mathcal{W})) - (\nabla_{\mathbf{w}}g(\mathbf{w}, \bar{\lambda}')^T \mathbf{v} + \exp(\lambda'_1)\phi^\circ(\mathbf{w}; \mathbf{v}; \mathcal{W}))| \\ &= |\nabla_{\mathbf{w}}g(\mathbf{w}, \bar{\lambda})^T \mathbf{v} - \nabla_{\mathbf{w}}g(\mathbf{w}, \bar{\lambda}')^T \mathbf{v}| + |\exp(\lambda_1) - \exp(\lambda'_1)| \cdot |\phi^\circ(\mathbf{w}; \mathbf{v}; \mathcal{W})| \end{aligned} \quad (13)$$

According to the Proposition 2.1.1 in Clarke (1990), we have

$$\begin{aligned} & |\phi^\circ(\mathbf{w}; \mathbf{v}; \mathcal{W})| \\ &= |\phi_{\bar{\mathbf{w}}}^\circ(\mathbf{w}; \mathbf{v}; \mathcal{W})| \\ &\leq L_{\phi_{\bar{\mathbf{w}}}} \|\mathbf{v}\|_2 \end{aligned} \quad (14)$$

Thus, we obtain

$$|c(\mathbf{w}, \lambda) - c(\mathbf{w}, \lambda')| \leq C \|\lambda - \lambda'\|_2. \quad (15)$$

where  $C$  is a constant. That completes the proof.

Since the objective  $f(\mathbf{w}, \boldsymbol{\lambda})$  and the constraint  $c(\mathbf{w}, \boldsymbol{\lambda})$  are both Lipschitz continuous, we have the following lemma,

**Lemma 2** (Necessary condition.) *Let  $(\mathbf{w}^*, \boldsymbol{\lambda}^*)$  be a stationary point of problem (8). Then  $(\mathbf{w}^*, \boldsymbol{\lambda}^*)$  together with  $\xi^* \geq 0$  satisfy the following conditions,*

$$\nabla_{\mathbf{w}} f(\mathbf{w}^*, \boldsymbol{\lambda}^*)^T \mathbf{v}_2 - (\mathbf{v}_2^T \nabla_{\mathbf{w}}^2 g(\mathbf{w}^*, \bar{\boldsymbol{\lambda}}^*) \mathbf{v}_1 + \exp(\lambda_1^*) \phi^{\circ\circ}(\mathbf{w}^*; \mathbf{v}_1, \mathbf{v}_2; \mathcal{W})) \xi^* \geq 0 \quad (16)$$

$$\nabla_{\boldsymbol{\lambda}} f(\mathbf{w}^*, \boldsymbol{\lambda}^*)^T \mathbf{v}_3 - (\bar{\mathbf{v}}_3^T \nabla_{\boldsymbol{\lambda}}^2 g(\mathbf{w}^*, \bar{\boldsymbol{\lambda}}^*) \mathbf{v}_1 + v_3^1 \exp(\lambda_1^*) \phi^{\circ}(\mathbf{w}^*; \mathbf{v}_1; \mathcal{W})) \xi^* \geq 0 \quad (17)$$

$$\nabla_{\mathbf{w}} g(\mathbf{w}^*, \bar{\boldsymbol{\lambda}}^*)^T \mathbf{v}_1 + \exp(\lambda_1^*) \phi^{\circ}(\mathbf{w}^*; \mathbf{v}_1; \mathcal{W}) \geq 0 \quad (18)$$

for all  $\mathbf{v}_1 \in \mathcal{T}_{\mathcal{W}}(\mathbf{w}^*) \cap \mathcal{V}_{\mathbf{w}^*}$ ,  $\mathbf{v}_2 \in \mathcal{T}_{\mathcal{W}}(\mathbf{w}^*)$ ,  $\mathbf{v}_3 \in \mathcal{T}_{\mathcal{U}}(\boldsymbol{\lambda}^*)$  if  $\text{rint}(\mathcal{T}_{\mathcal{W}}(\mathbf{w}^*)) \cap \mathcal{V}_{\mathbf{w}^*} \neq \emptyset$ , where  $\mathbf{v}_3 = [v_3^1, \bar{\mathbf{v}}_3^T]^T$  and

$$\phi^{\circ\circ}(\mathbf{w}^*; \mathbf{v}_1, \mathbf{v}_2; \mathcal{W}) = \limsup_{\substack{\mathbf{w} \mapsto \mathbf{w}^*, \mathbf{w} \in \mathcal{W} \\ s \downarrow 0, \mathbf{w} + s\mathbf{v}_2 \in \mathcal{W}}} \frac{\phi^{\circ}(\mathbf{w} + \mathbf{v}_2 s; \mathbf{v}_1; \mathcal{W}) - \phi^{\circ}(\mathbf{w}; \mathbf{v}_1; \mathcal{W})}{s} \quad (19)$$

**Proof 2** Since  $c(\mathbf{w}, \boldsymbol{\lambda})$  and  $f(\mathbf{w}, \boldsymbol{\lambda})$  are Lipschitz continuous, based on the theorem 1 in Clarke (1976),  $(\mathbf{w}^*, \boldsymbol{\lambda}^*)$  is the stationary point of the following Lagrange function of problem (8)

$$\mathcal{L}(\mathbf{w}, \boldsymbol{\lambda}, \xi) = f(\mathbf{w}) - c(\mathbf{w}, \boldsymbol{\lambda})^T \xi \quad (20)$$

where  $\xi \geq 0$ . Thus, we have

$$\mathbf{0} \in \partial_{\mathbf{w}} \mathcal{L}(\mathbf{w}^*, \boldsymbol{\lambda}^*, \xi^*) + \mathcal{N}_{\mathcal{W}}(\mathbf{w}^*) \quad (21)$$

$$\mathbf{0} \in \partial_{\boldsymbol{\lambda}} \mathcal{L}(\mathbf{w}^*, \boldsymbol{\lambda}^*, \xi^*) + \mathcal{N}_{\mathcal{U}}(\boldsymbol{\lambda}^*) \quad (22)$$

$$\nabla_{\mathbf{w}} g(\mathbf{w}^*, \bar{\boldsymbol{\lambda}}^*)^T \mathbf{v}_1 + \lambda_1^* \phi^{\circ}(\mathbf{w}^*; \mathbf{v}_1; \mathcal{W}) \geq 0 \quad (23)$$

where  $\mathcal{N}_{\mathcal{W}}(\mathbf{w}^*)$  and  $\mathcal{N}_{\mathcal{U}}(\boldsymbol{\lambda}^*)$  are the normal cones of  $\mathcal{W}$  and  $\mathcal{U}$ .

Since  $c(\mathbf{w}, \boldsymbol{\lambda})$  and  $f(\mathbf{w}, \boldsymbol{\lambda})$  are Lipschitz continuous, we have

$$\begin{aligned} & |\mathcal{L}(\mathbf{w}, \boldsymbol{\lambda}, \xi) - \mathcal{L}(\mathbf{w}', \boldsymbol{\lambda}, \xi)| \\ & \leq |f(\mathbf{w}, \boldsymbol{\lambda}) - f(\mathbf{w}', \boldsymbol{\lambda})| + \xi |c(\mathbf{w}, \boldsymbol{\lambda}) - c(\mathbf{w}', \boldsymbol{\lambda})| \\ & \leq (L_f^{\mathbf{w}} + L_g^{\mathbf{w}} + L_{\phi_{\bar{\mathbf{w}}}}^{\mathbf{w}}) \|\mathbf{w} - \mathbf{w}'\|_2, \end{aligned} \quad (24)$$

where  $L_f^{\mathbf{w}}$  is the Lipschitz constant of  $f$  on  $\mathbf{w}$ . This means  $\mathcal{L}(\mathbf{w}, \boldsymbol{\lambda}, \xi)$  is Lipschitz continuous. Thus, condition 21 is equivalent to

$$\mathcal{L}_{\mathbf{w}}^{\circ}(\mathbf{w}^*, \boldsymbol{\lambda}^*, \xi^*; \mathbf{v}_2; \mathcal{W}) \geq 0, \forall \mathbf{v}_2 \in \mathcal{T}_{\mathcal{W}}(\mathbf{w}^*) \quad (25)$$

where  $\mathcal{L}_{\mathbf{w}}^{\circ}(\mathbf{w}^*, \boldsymbol{\lambda}^*, \xi^*; \mathbf{v}_2; \mathcal{W})$  is the generalized clarke directional derivative at  $\mathbf{w}^*$  defined as follows

$$\mathcal{L}_{\mathbf{w}}^{\circ}(\mathbf{w}^*, \boldsymbol{\lambda}^*, \xi^*; \mathbf{v}_2; \mathcal{W}) = \limsup_{\substack{\mathbf{w} \mapsto \mathbf{w}^*, \mathbf{w} \in \mathcal{W} \\ s \downarrow 0, \mathbf{w} + s\mathbf{v}_2 \in \mathcal{W}}} \frac{\mathcal{L}(\mathbf{w} + s\mathbf{v}_2, \boldsymbol{\lambda}^*, \xi^*) - \mathcal{L}(\mathbf{w}, \boldsymbol{\lambda}^*, \xi^*)}{s}. \quad (26)$$

Then, for all  $\mathbf{v}_2 \in \mathcal{T}_{\mathcal{W}}(\mathbf{w}^*)$ , we have,

$$\begin{aligned}
& \mathcal{L}_w^\circ(\mathbf{w}^*, \boldsymbol{\lambda}^*, \xi^*; \mathbf{v}_2; \mathcal{W}) \\
&= \limsup_{\substack{\mathbf{w} \mapsto \mathbf{w}^*, \mathbf{w} \in \mathcal{W} \\ s \downarrow 0, \mathbf{w} + s\mathbf{v}_2 \in \mathcal{W}}} \frac{\mathcal{L}(\mathbf{w} + s\mathbf{v}_2, \boldsymbol{\lambda}^*, \xi^*) - \mathcal{L}(\mathbf{w}, \boldsymbol{\lambda}^*, \xi^*)}{s} \\
&= \limsup_{\substack{\mathbf{w} \mapsto \mathbf{w}^*, \mathbf{w} \in \mathcal{W} \\ s \downarrow 0, \mathbf{w} + s\mathbf{v}_2 \in \mathcal{W}}} \frac{f(\mathbf{w} + s\mathbf{v}_2, \boldsymbol{\lambda}^*) - f(\mathbf{w}, \boldsymbol{\lambda}^*, \xi^*)}{s} \\
&\quad - \xi^* \limsup_{\substack{\mathbf{w} \mapsto \mathbf{w}^*, \mathbf{w} \in \mathcal{W} \\ s \downarrow 0, \mathbf{w} + s\mathbf{v}_2 \in \mathcal{W}}} \frac{g(\mathbf{w} + s\mathbf{v}_1, \boldsymbol{\lambda}^*)\mathbf{v}_2 - g(\mathbf{w}, \boldsymbol{\lambda}^*)\mathbf{v}_1}{s} \\
&\quad - \exp(\lambda_1^*)\xi^* \limsup_{\substack{\mathbf{w} \mapsto \mathbf{w}^*, \mathbf{w} \in \mathcal{W} \\ s \downarrow 0, \mathbf{w} + s\mathbf{v}_2 \in \mathcal{W}}} \frac{\phi^\circ(\mathbf{w} + s\mathbf{v}_2; \mathbf{v}_1; \mathcal{W}) - \phi^\circ(\mathbf{w}^*; \mathbf{v}_1; \mathcal{W})}{s} \\
&= \nabla_{\mathbf{w}} f(\mathbf{w}^*, \boldsymbol{\lambda}^*)^T \mathbf{v}_2 - (\mathbf{v}_2^T \nabla_{\mathbf{w}}^2 g(\mathbf{w}^*, \bar{\boldsymbol{\lambda}}^*) \mathbf{v}_1 + \exp(\lambda_1^*) \phi^{\circ\circ}(\mathbf{w}^*; \mathbf{v}_1, \mathbf{v}_2; \mathcal{W})) \xi^* \\
&\geq 0
\end{aligned} \tag{27}$$

where

$$\phi^{\circ\circ}(\mathbf{w}^*; \mathbf{v}_1, \mathbf{v}_2; \mathcal{W}) = \limsup_{\substack{\mathbf{w} \mapsto \mathbf{w}^*, \mathbf{w} \in \mathcal{W} \\ s \downarrow 0, \mathbf{w} + s\mathbf{v}_2 \in \mathcal{W}}} \frac{\phi^\circ(\mathbf{w} + s\mathbf{v}_2; \mathbf{v}_1; \mathcal{W}) - \phi^\circ(\mathbf{w}; \mathbf{v}_1; \mathcal{W})}{s} \tag{28}$$

Using the same method, we can obtain condition (22) is equivalent to

$$\nabla_{\boldsymbol{\lambda}} f(\mathbf{w}^*, \boldsymbol{\lambda}^*)^T \mathbf{v}_3 - (\bar{v}_3 \nabla_{\bar{\boldsymbol{\lambda}}}^2 g(\mathbf{w}^*, \bar{\boldsymbol{\lambda}}^*) \mathbf{v}_1 + v_3^1 \exp(\lambda_1^*) \phi^\circ(\mathbf{w}^*; \mathbf{v}_1; \mathcal{W})) \xi^* \geq 0 \tag{29}$$

for all  $\mathbf{v}_3 \in \mathcal{T}_{\mathcal{U}}(\boldsymbol{\lambda})$ .

Therefore, conditions (16)-(18) is equivalent to conditions (21)-(23).

Then, based on Lemma 2, we have the following corollary ,

**Corollary 1** (Sufficient condition.)  $(\mathbf{w}^*, \boldsymbol{\lambda}^*)$  is said to be a stationary point of problem (8), if it satisfies the following conditions for all  $\mathbf{v}_1 \in \mathcal{T}_{\mathcal{W}}(\mathbf{w}^*) \cap \mathcal{V}_{\mathbf{w}^*}$ ,  $\mathbf{v}_2 \in \mathcal{T}_{\mathcal{W}}(\mathbf{w}^*)$  and  $\mathbf{v}_3 \in \mathcal{T}_{\mathcal{U}}(\boldsymbol{\lambda}^*)$

$$\nabla_{\mathbf{w}} f(\mathbf{w}^*, \boldsymbol{\lambda}^*)^T \mathbf{v}_2 - (\mathbf{v}_2^T \nabla_{\mathbf{w}}^2 g(\mathbf{w}^*, \bar{\boldsymbol{\lambda}}^*) \mathbf{v}_1 + \exp(\lambda_1^*) \phi^{\circ\circ}(\mathbf{w}^*; \mathbf{v}_1, \mathbf{v}_2; \mathcal{W})) \xi^* \geq 0 \tag{30}$$

$$\nabla_{\boldsymbol{\lambda}} f(\mathbf{w}^*, \boldsymbol{\lambda}^*)^T \mathbf{v}_3 - (\bar{v}_3 \nabla_{\bar{\boldsymbol{\lambda}}}^2 g(\mathbf{w}^*, \bar{\boldsymbol{\lambda}}^*) \mathbf{v}_1 + v_3^1 \exp(\lambda_1^*) \phi^\circ(\mathbf{w}^*; \mathbf{v}_1; \mathcal{W})) \xi^* \geq 0 \tag{31}$$

$$\nabla_{\mathbf{w}} g(\mathbf{w}^*, \bar{\boldsymbol{\lambda}}^*)^T \mathbf{v}_1 + \exp(\lambda_1^*) \phi^\circ(\mathbf{w}^*; \mathbf{v}_1; \mathcal{W}) \geq 0 \tag{32}$$

where  $\xi^* \geq 0$  and  $\mathbf{v}_3 = [v_3^1, \bar{\mathbf{v}}_3^T]^T$  and

$$\phi^{\circ\circ}(\mathbf{w}^*; \mathbf{v}_1, \mathbf{v}_2; \mathcal{W}) = \limsup_{\substack{\mathbf{w} \mapsto \mathbf{w}^*, \mathbf{w} \in \mathcal{W} \\ s \downarrow 0, \mathbf{w} + s\mathbf{v}_2 \in \mathcal{W}}} \frac{\phi^\circ(\mathbf{w} + \mathbf{v}_2 s; \mathbf{v}_1; \mathcal{W}) - \phi^\circ(\mathbf{w}; \mathbf{v}_1; \mathcal{W})}{s} \tag{33}$$

According to Dempe & Zemkoho (2020), if the lower problem is convex, then the bilevel optimization problem

$$\min_{\boldsymbol{\lambda}} f(\mathbf{w}^*, \boldsymbol{\lambda}) \quad \text{s.t. } \mathbf{w}^* \in \arg \min_{\mathbf{w}} g(\mathbf{w}, \bar{\boldsymbol{\lambda}}) + \exp(\lambda_1) \varphi(h(\mathbf{w})), \tag{34}$$

is equivalent to the single level problem

$$\min_{\boldsymbol{\lambda}, \mathbf{w}} f(\mathbf{w}, \boldsymbol{\lambda}) \quad \text{s.t. } \mathbf{0} \in \nabla_{\mathbf{w}} g(\mathbf{w}, \bar{\boldsymbol{\lambda}}) + \exp(\lambda_1) \partial_{\mathbf{w}} \varphi(h(\mathbf{w})), \tag{35}$$

where  $\partial_{\mathbf{w}} \varphi(h(\mathbf{w}))$  is the subgradient. Then, according to Bian & Chen (2017), we have

$$\nabla_{\mathbf{w}} g(\mathbf{w}^*, \bar{\boldsymbol{\lambda}}^*)^T \mathbf{v}_1 + \exp(\lambda_1^*) \phi^\circ(\mathbf{w}^*; \mathbf{v}_1; \mathcal{W}) \geq 0, \tag{36}$$

is equivalent to

$$\mathbf{0} \in \nabla_{\mathbf{w}} g(\mathbf{w}, \bar{\boldsymbol{\lambda}}) + \exp(\lambda_1) \partial_{\mathbf{w}} \varphi(h(\mathbf{w})). \quad (37)$$

This means that if a point is the stationary point of the problem

$$\min_{\mathbf{w} \in \mathcal{W}, \boldsymbol{\lambda} \in \mathcal{U}} f(\mathbf{w}, \boldsymbol{\lambda}) \quad (38)$$

$$s.t. \ c(\mathbf{w}, \boldsymbol{\lambda}) = \nabla_{\mathbf{w}} g(\mathbf{w}, \bar{\boldsymbol{\lambda}})^T \mathbf{v} + \exp(\lambda_1) \phi^\circ(\mathbf{w}; \mathbf{v}; \mathcal{W}) \geq 0 \ \forall \mathbf{v} \in \mathcal{T}_{\mathcal{W}}(\mathbf{w}) \cap \mathcal{V}_{\mathbf{w}}, \quad (39)$$

then, it is a stationary point of the above problem 35. Thus, it means that such a point is the stationary point of the original nonsmooth bilevel problem if the lower level problem is convex and nonsmooth. In addition, if the lower-level problem is nonconvex, the conditions 16-18 are the necessary conditions of the original bilevel problem. Therefore, we have the following definition,

**Definition 5**  $(\mathbf{w}^*, \boldsymbol{\lambda}^*)$  is said to be a stationary point of problem (??), if it satisfies the following conditions for all  $\mathbf{v}_1 \in \mathcal{T}_{\mathcal{W}}(\mathbf{w}^*) \cap \mathcal{V}_{\mathbf{w}^*}$ ,  $\mathbf{v}_2 \in \mathcal{T}_{\mathcal{W}}(\mathbf{w}^*)$  and  $\mathbf{v}_3 \in \mathcal{T}_{\mathcal{U}}(\boldsymbol{\lambda}^*)$ , where  $\mathcal{U} = \mathbb{R}^m$  and the lower-level problem is convex,

$$\nabla_{\mathbf{w}} f(\mathbf{w}^*, \boldsymbol{\lambda}^*)^T \mathbf{v}_2 - (\mathbf{v}_2^T \nabla_{\mathbf{w}}^2 g(\mathbf{w}^*, \bar{\boldsymbol{\lambda}}^*) \mathbf{v}_1 + \exp(\lambda_1^*) \phi^{\circ\circ}(\mathbf{w}^*; \mathbf{v}_1, \mathbf{v}_2; \mathcal{W})) \xi^* \geq 0 \quad (40)$$

$$\nabla_{\boldsymbol{\lambda}} f(\mathbf{w}^*, \boldsymbol{\lambda}^*)^T \mathbf{v}_3 - (\bar{\mathbf{v}}_3^T \nabla_{\boldsymbol{\lambda}}^2 g(\mathbf{w}^*, \bar{\boldsymbol{\lambda}}^*) \mathbf{v}_1 + \mathbf{v}_3^T \exp(\lambda_1^*) \phi^\circ(\mathbf{w}^*; \mathbf{v}_1; \mathcal{W})) \xi^* \geq 0 \quad (41)$$

$$\nabla_{\mathbf{w}} g(\mathbf{w}^*, \bar{\boldsymbol{\lambda}}^*)^T \mathbf{v}_1 + \exp(\lambda_1^*) \phi^\circ(\mathbf{w}^*; \mathbf{v}_1; \mathcal{W}) \geq 0 \quad (42)$$

where  $\xi^* \geq 0$ ,  $\mathbf{v}_3 = [v_3^1, \bar{\mathbf{v}}_3^T]^T$ ,  $\phi^{\circ\circ}(\mathbf{w}^*; \mathbf{v}_1, \mathbf{v}_2; \mathcal{W}) = \limsup_{\substack{\mathbf{w} \mapsto \mathbf{w}^*, \mathbf{w} \in \mathcal{W} \\ s \downarrow 0, \mathbf{w} + s\mathbf{v}_2 \in \mathcal{W}}} \frac{\phi^\circ(\mathbf{w} + \mathbf{v}_2 s; \mathbf{v}_1; \mathcal{W}) - \phi^\circ(\mathbf{w}; \mathbf{v}_1; \mathcal{W})}{s}$ . and  $\phi^\circ(\mathbf{w}; \mathbf{v}_1; \mathcal{W}) = \limsup_{\substack{\mathbf{w}' \mapsto \mathbf{w}, \mathbf{w}' \in \mathcal{W} \\ t \downarrow 0, \mathbf{w}' + t\mathbf{v} \in \mathcal{W}}} \frac{\varphi(h(\mathbf{w}' + t\mathbf{v})) - \varphi(h(\mathbf{w}'))}{t}$  denotes the Clarke generalized directional derivative of  $\varphi(h(\mathbf{w}))$  at point  $\mathbf{w}$ . Note if the lower-level problem is nonconvex, conditions 16-18 is the necessary conditions of the original nonsmooth, perhaps non-Lipschitz bilevel problem.

## 1.2 CONVERGE TO THE STATIONARY POINT

In this subsection, we show our method will finally converge to the stationary point of problem (8).

**Theorem 1** Suppose  $\{\epsilon_{i,k}\}_{k=1}^\infty$  ( $i = 1, 2, 3$ ) are positive and convergent ( $\lim_{k \rightarrow \infty} \epsilon_{i,k} = 0$ ) sequences,  $\{\mu^k\}_{k=1}^\infty$  is a positive and convergent ( $\lim_{k \rightarrow \infty} \mu^k = 0$ ) sequence, and  $\beta^k$  is increasing and divergent ( $\beta^1 < \beta^2 < \dots$ ). Then any limit point of the sequence points generated by SPNBO satisfies the conditions (16)-(18).

**Proof 3** In our method, we solve the following smoothed single level problem for each given  $\mu^k$

$$\min_{\mathbf{w} \in \mathcal{W}, \boldsymbol{\lambda} \in \mathcal{U}} f(\mathbf{w}, \boldsymbol{\lambda}) \quad (43)$$

$$s.t. \ c^{\mu^k}(\mathbf{w}, \boldsymbol{\lambda}) := \nabla_{\mathbf{w}} g(\mathbf{w}, \bar{\boldsymbol{\lambda}}) + \exp(\lambda_1) \nabla_{\mathbf{w}} \varphi(\tilde{h}(\mathbf{w}, \mu^k)) = \mathbf{0},$$

where  $\nabla_{\mathbf{w}} \varphi(\tilde{h}(\mathbf{w}, \mu^k)) = \varphi'(z)_{h(\mathbf{w}, \mu^k)} \nabla_{\mathbf{w}} h(\mathbf{w}, \mu^k)$  and  $\mu^k$  is the smoothing parameter.

Its corresponding augmented Lagrangian function can be rewritten as follows,

$$\hat{\mathcal{L}}(\mathbf{w}, \boldsymbol{\lambda}, \boldsymbol{\alpha}, \beta, \mu) = f(\mathbf{w}, \boldsymbol{\lambda}) + \frac{1}{d} \sum_{j=1}^d \left( \alpha_j c_j^{\mu^k}(\mathbf{w}, \boldsymbol{\lambda}) + \frac{\beta^k}{2} c_j^{\mu^k}(\mathbf{w}, \boldsymbol{\lambda})^2 \right) \quad (44)$$

where  $\boldsymbol{\alpha}$  denotes the Lagrangian multiplier,  $\beta^k > 0$  denotes the penalty parameter and  $\alpha_j$  and  $c_j^{\mu^k}(\mathbf{w}, \boldsymbol{\lambda})$  is the  $j$ -th element of  $\boldsymbol{\alpha}$  and  $c^{\mu^k}(\mathbf{w}, \boldsymbol{\lambda})$ .

Based on the tolerance condition, we have

$$\frac{1}{d} \|c^{\mu^k}(\mathbf{w}, \boldsymbol{\lambda})\|_2^2 \leq \epsilon_{3,k}^2 \quad (45)$$

Multiplying  $\|\mathbf{v}_1\|_2^2$ , where  $\mathbf{v}_1 \in \mathcal{T}_{\mathcal{W}}(\mathbf{w}^*) \cap \mathcal{V}_{\mathbf{w}^*}$ , on both sides of above equality, we have

$$\|c^{\mu^k}(\mathbf{w}, \boldsymbol{\lambda})\|_2 \|\mathbf{v}_1\|_2 \leq \epsilon_{3,k} \sqrt{d} \|\mathbf{v}_1\|_2 \quad (46)$$

According to  $|ab| \leq \|a\|_2 \|b\|_2$ , we have

$$|c^{\mu^k}(\mathbf{w}, \boldsymbol{\lambda})^T \mathbf{v}_1| \leq \epsilon_{3,k} \sqrt{d} \|\mathbf{v}_1\|_2. \quad (47)$$

Thus, we have

$$c^{\mu^k}(\mathbf{w}, \boldsymbol{\lambda})^T \mathbf{v}_1 \geq -\epsilon_{3,k} \sqrt{d} \|\mathbf{v}_1\|_2. \quad (48)$$

Then, taking the limit on both sides (i.e.,  $k \rightarrow \infty$ ), we have

$$\lim_{k \rightarrow \infty} c^{\mu^k}(\mathbf{w}, \boldsymbol{\lambda})^T \mathbf{v}_1 \geq 0 \quad (49)$$

Then, according to the Theorem 2 in Bian & Chen (2017), we have

$$\lim_{k \rightarrow \infty} c^{\mu^k}(\mathbf{w}, \boldsymbol{\lambda})^T \mathbf{v}_1 = \nabla_{\mathbf{w}} g(\mathbf{w}^*, \bar{\boldsymbol{\lambda}}^*)^T \mathbf{v}_1 + \exp(\lambda_1^*) \phi^\circ(\mathbf{w}^*; \mathbf{v}_1; \mathcal{W}) \quad (50)$$

Thus, we have

$$\nabla_{\mathbf{w}} g(\mathbf{w}^*, \bar{\boldsymbol{\lambda}}^*)^T \mathbf{v}_1 + \exp(\lambda_1^*) \phi^\circ(\mathbf{w}^*; \mathbf{v}_1; \mathcal{W}) \geq 0 \quad (51)$$

Let  $\hat{\boldsymbol{\alpha}}^k = -\boldsymbol{\alpha}^k - \beta c^{\mu^k}(\mathbf{w}^k, \boldsymbol{\lambda}^k)$ . Then, we have

$$|c^{\mu^k}(\mathbf{w}^k, \boldsymbol{\lambda}^k)^T \hat{\boldsymbol{\alpha}}^k| \leq \epsilon_{2,k}^2 \quad (52)$$

Assume the limitation of  $c^{\mu^k}$  exists. Taking the limit on both sides, we have

$$\lim_{k \rightarrow \infty} |c^{\mu^k}(\mathbf{w}^k, \boldsymbol{\lambda}^k)^T \hat{\boldsymbol{\alpha}}^k| \leq 0 \quad (53)$$

It means that

$$\lim_{k \rightarrow \infty} c^{\mu^k}(\mathbf{w}^k, \boldsymbol{\lambda}^k)^T \hat{\boldsymbol{\alpha}}^k = 0. \quad (54)$$

Therefore, we have  $\hat{\boldsymbol{\alpha}}^* \in \mathcal{T}_{\mathcal{W}}(\mathbf{w}^*)$ . If  $\hat{\boldsymbol{\alpha}}^* \notin \mathcal{V}_{\mathbf{w}^*}$ , the limitation doesn't exist, since  $\phi$  is not lipschitz continuous. This means that we have  $\hat{\boldsymbol{\alpha}}^* \in \mathcal{T}_{\mathcal{W}}(\mathbf{w}^*) \cap \mathcal{V}_{\mathbf{w}^*}$ . Let  $\hat{\boldsymbol{\alpha}}^* = \xi^* \mathbf{v}_1 \in \mathcal{T}_{\mathcal{W}}(\mathbf{w}^*) \cap \mathcal{V}_{\mathbf{w}^*}$  and  $\xi^* \geq 0$ , such that

$$\begin{aligned} & \lim_{k \rightarrow \infty} c^{\mu^k}(\mathbf{w}^k, \boldsymbol{\lambda}^k)^T \hat{\boldsymbol{\alpha}}^k \\ &= c^{\mu^*}(\mathbf{w}^*, \boldsymbol{\lambda}^*)^T \xi^* \mathbf{v}_1 \\ &= \xi^* (\nabla_{\mathbf{w}} g(\mathbf{w}^*, \bar{\boldsymbol{\lambda}}^*)^T \mathbf{v}_1 + \exp(\lambda_1^*) \phi^\circ(\mathbf{w}^*; \mathbf{v}_1; \mathcal{W})) \\ &= 0 \end{aligned} \quad (55)$$

We also have

$$\|\nabla_{\mathbf{w}} f(\mathbf{w}^k, \boldsymbol{\lambda}^k) - \nabla_{\mathbf{w}} c^{\mu^k}(\mathbf{w}^k, \boldsymbol{\lambda}^k) \hat{\boldsymbol{\alpha}}^k\|_2^2 \leq \epsilon_{1,k}^2 \quad (56)$$

Assume that we have a vector  $\mathbf{v}_2 \in \mathcal{T}_{\mathcal{W}}(\mathbf{w}^*)$ . Multiplying  $\|\mathbf{v}_2\|_2^2$  on the both side of the above inequality, we have

$$\|\nabla_{\mathbf{w}} f(\mathbf{w}^k, \boldsymbol{\lambda}^k) - \nabla_{\mathbf{w}} c^{\mu^k}(\mathbf{w}^k, \boldsymbol{\lambda}^k) \hat{\boldsymbol{\alpha}}^k\|_2 \|\mathbf{v}_2\|_2 \leq \epsilon_{1,k} \|\mathbf{v}_2\|_2. \quad (57)$$

According to  $|\langle \mathbf{a}, \mathbf{b} \rangle| \leq \|\mathbf{a}\|_2 \|\mathbf{b}\|_2$ , we have

$$|\langle \nabla_{\mathbf{w}} f(\mathbf{w}^k, \boldsymbol{\lambda}^k) - \nabla_{\mathbf{w}} c^{\mu^k}(\mathbf{w}^k, \boldsymbol{\lambda}^k) \hat{\boldsymbol{\alpha}}^k, \mathbf{v}_2 \rangle| \leq \epsilon_{1,k} \|\mathbf{v}_2\|_2 \quad (58)$$

Obviously, we have

$$\langle \nabla_{\mathbf{w}} f(\mathbf{w}^k, \boldsymbol{\lambda}^k) - \nabla_{\mathbf{w}} c^{\mu^k}(\mathbf{w}^k, \boldsymbol{\lambda}^k) \hat{\boldsymbol{\alpha}}^k, \mathbf{v}_2 \rangle \geq -\epsilon_{1,k} \|\mathbf{v}_2\|_2 \quad (59)$$

Besides, we have

$$\begin{aligned} & \nabla_{\mathbf{w}} \left( f(\mathbf{w}^k, \boldsymbol{\lambda}^k) - c^{\mu^k}(\mathbf{w}^k, \boldsymbol{\lambda}^k) \hat{\boldsymbol{\alpha}}^k \right) \\ &= \nabla_{\mathbf{w}} \left( f(\mathbf{w}^k, \boldsymbol{\lambda}^k) - \langle \nabla_{\mathbf{w}} g(\mathbf{w}, \bar{\boldsymbol{\lambda}}), \hat{\boldsymbol{\alpha}}^k \rangle - \exp(\lambda_1) \langle \nabla \psi(\mathbf{z})_{\mathbf{z}=\tilde{h}(\mathbf{w}^k, \mu^k)}, \nabla_{\mathbf{w}} \tilde{h}(\mathbf{w}^k, \mu^k)^T \hat{\boldsymbol{\alpha}}^k \rangle \right) \end{aligned} \quad (60)$$

where

$$\begin{aligned} & \nabla_{\mathbf{w}} \tilde{h}(\mathbf{w}^k, \mu^k)^T \hat{\boldsymbol{\alpha}}^k \\ &= \left( \nabla_{\mathbf{w}} \tilde{h}_1(\mathbf{D}_1 \mathbf{w}^k, \mu^k)^T \hat{\boldsymbol{\alpha}}^k, \nabla_{\mathbf{w}} \tilde{h}_2(\mathbf{D}_2 \mathbf{w}^k, \mu^k)^T \hat{\boldsymbol{\alpha}}^k, \dots, \nabla_{\mathbf{w}} \tilde{h}_n(\mathbf{D}_n \mathbf{w}^k, \mu^k)^T \hat{\boldsymbol{\alpha}}^k \right)^T \end{aligned} \quad (61)$$

Let  $\hat{\boldsymbol{\alpha}}^k = \xi^k \mathbf{v}_1 \in \mathcal{V}_{\mathbf{w}^k}$  and  $\xi \geq 0$ . For  $i \in \mathcal{I}_{\mathbf{w}^k}$ , we obtain  $\mathbf{D}_i^T \hat{\boldsymbol{\alpha}}^k = \mathbf{0}$ , then  $\nabla_{\mathbf{w}} \tilde{h}_i(\mathbf{D}_i \mathbf{w}^k, \mu^k)^T \hat{\boldsymbol{\alpha}}^k = \nabla_{\mathbf{z}} \tilde{h}_i(\mathbf{z}, \mu^k)^T_{\mathbf{z}=\mathbf{D}_i^T \mathbf{w}^k} \mathbf{D}_i^T \hat{\boldsymbol{\alpha}}^k = \mathbf{0}$ . Besides, we define the smoothing function

$$\tilde{h}_i^{\bar{\mathbf{w}}}(\mathbf{D}_i \mathbf{w}, \mu) := \begin{cases} \tilde{h}_i(\mathbf{D}_i^T \mathbf{w}, \mu) & i \notin \mathcal{I}_{\bar{\mathbf{w}}} \\ \tilde{h}_i(\mathbf{D}_i^T \bar{\mathbf{w}}, \mu) & i \in \mathcal{I}_{\bar{\mathbf{w}}} \end{cases} \quad (62)$$

and  $\tilde{h}_{\bar{\mathbf{w}}}(\mathbf{w}, \mu) = \left( \tilde{h}_1^{\bar{\mathbf{w}}}(\mathbf{D}_1 \mathbf{w}, \mu), \tilde{h}_2^{\bar{\mathbf{w}}}(\mathbf{D}_2 \mathbf{w}, \mu), \dots, \tilde{h}_n^{\bar{\mathbf{w}}}(\mathbf{D}_n \mathbf{w}, \mu) \right)^T$ . We can obtain the smoothing function  $\phi$  and  $\phi_{\bar{\mathbf{w}}}$  as  $\tilde{\phi}(\mathbf{w}^k, \mu^k) = \varphi(h_{\bar{\mathbf{w}}}(\mathbf{w}, \mu^k))$  and  $\tilde{\phi}_{\bar{\mathbf{w}}}(\mathbf{w}^k, \mu^k) = \varphi(h_{\bar{\mathbf{w}}}(\mathbf{w}, \mu^k))$ . Then, we have

$$\nabla_{\mathbf{w}} \tilde{h}(\mathbf{w}^k, \mu^k)^T \hat{\boldsymbol{\alpha}}^k = \nabla_{\mathbf{w}} \tilde{h}_{\bar{\mathbf{w}}}(\mathbf{w}^k, \mu^k)^T \hat{\boldsymbol{\alpha}}^k \quad (63)$$

Thus, coming back to (50), we obtain

$$\begin{aligned} & f(\mathbf{w}^k, \boldsymbol{\lambda}^k) - c^{\mu^k}(\mathbf{w}^k, \boldsymbol{\lambda}^k) \hat{\boldsymbol{\alpha}}^k \\ &= f(\mathbf{w}^k, \boldsymbol{\lambda}^k) - \langle \nabla_{\mathbf{w}} g(\mathbf{w}, \bar{\boldsymbol{\lambda}}), \hat{\boldsymbol{\alpha}}^k \rangle - \exp(\lambda_1) \langle \nabla \psi(\mathbf{z})_{\mathbf{z}=\tilde{h}(\mathbf{w}^k, \mu^k)}, \nabla_{\mathbf{w}} \tilde{h}_{\bar{\mathbf{w}}}(\mathbf{w}^k, \mu^k)^T \hat{\boldsymbol{\alpha}}^k \rangle \\ &= f(\mathbf{w}^k, \boldsymbol{\lambda}^k) - \langle \nabla_{\mathbf{w}} g(\mathbf{w}, \bar{\boldsymbol{\lambda}}), \xi^k \mathbf{v}_1 \rangle - \exp(\lambda_1) \langle \nabla \psi(\mathbf{z})_{\mathbf{z}=\tilde{h}(\mathbf{w}^k, \mu^k)}, \nabla_{\mathbf{w}} \tilde{h}_{\bar{\mathbf{w}}}(\mathbf{w}^k, \mu^k)^T \xi^k \mathbf{v}_1 \rangle \\ &= f(\mathbf{w}^k, \boldsymbol{\lambda}^k) - \langle \nabla_{\mathbf{w}} g(\mathbf{w}, \bar{\boldsymbol{\lambda}}), \xi^k \mathbf{v}_1 \rangle - \exp(\lambda_1) \xi^k \tilde{\phi}_{\bar{\mathbf{w}}}^{\circ}(\mathbf{w}^k, \mu^k; \mathbf{v}_1; \mathcal{W}) \end{aligned}$$

where  $\tilde{\phi}_{\bar{\mathbf{w}}}^{\circ}(\mathbf{w}^k, \mu^k; \mathbf{v}_1; \mathcal{W})$  is the directional derivative of  $\tilde{\phi}_{\bar{\mathbf{w}}}(\mathbf{w}^k, \mu^k)$ . Then, we can calculate directional derivative on  $\mathbf{v}_2$  as follows,

$$\begin{aligned} & \left\langle \nabla_{\mathbf{w}} \left( f(\mathbf{w}^k, \boldsymbol{\lambda}^k) - c^{\mu^k}(\mathbf{w}^k, \boldsymbol{\lambda}^k) \hat{\boldsymbol{\alpha}}^k \right), \mathbf{v}_2 \right\rangle \\ &= \nabla_{\mathbf{w}} f(\mathbf{w}^k, \boldsymbol{\lambda}^k)^T \mathbf{v}_2 - \xi^k \mathbf{v}_2^T \nabla_{\mathbf{w}}^2 g(\mathbf{w}^k, \bar{\boldsymbol{\lambda}}^k) \mathbf{v}_1 \\ & \quad - \lambda_1 \xi^k \limsup_{\substack{\mathbf{w} \mapsto \mathbf{w}^k, \mathbf{w} \in \mathcal{W} \\ s \downarrow 0, \mathbf{w} + s\mathbf{v}_2 \in \mathcal{W}}} \frac{\tilde{\phi}_{\bar{\mathbf{w}}}^{\circ}(\mathbf{w} + \mathbf{v}_2 s, \mu^k; \mathbf{v}_1; \mathcal{W}) - \tilde{\phi}_{\bar{\mathbf{w}}}^{\circ}(\mathbf{w}, \mu^k; \mathbf{v}_1; \mathcal{W})}{s} \\ &= \nabla_{\mathbf{w}} f(\mathbf{w}^k, \boldsymbol{\lambda}^k)^T \mathbf{v}_2 - \xi^k \mathbf{v}_2^T \nabla_{\mathbf{w}}^2 g(\mathbf{w}^k, \bar{\boldsymbol{\lambda}}^k) \mathbf{v}_1 \\ & \quad - \lambda_1 \xi^k \limsup_{\substack{\mathbf{w} \mapsto \mathbf{w}^k, \mathbf{w} \in \mathcal{W} \\ s \downarrow 0, \mathbf{w} + s\mathbf{v}_2 \in \mathcal{W}}} \frac{\tilde{\phi}^{\circ}(\mathbf{w} + \mathbf{v}_2 s, \mu^k; \mathbf{v}_1; \mathcal{W}) - \tilde{\phi}^{\circ}(\mathbf{w}, \mu^k; \mathbf{v}_1; \mathcal{W})}{s} \end{aligned} \quad (64)$$

Let  $k \rightarrow \infty$  and  $\mathbf{v}_1 \in \mathcal{T}_{\mathcal{W}}(\mathbf{w}^*) \cap \mathcal{V}_{\mathbf{w}^*}$ , we obtain

$$\begin{aligned} & \lim_{k \rightarrow \infty} \left\langle \nabla_{\mathbf{w}} \left( f(\mathbf{w}^k, \boldsymbol{\lambda}^k) - c^{\mu^k}(\mathbf{w}^k, \boldsymbol{\lambda}^k) \hat{\boldsymbol{\alpha}}^k \right), \mathbf{v}_2 \right\rangle \\ &= \lim_{k \rightarrow \infty} \left( \nabla_{\mathbf{w}} f(\mathbf{w}^k, \boldsymbol{\lambda}^k)^T \mathbf{v}_2 - \xi^k \mathbf{v}_2^T \nabla_{\mathbf{w}}^2 g(\mathbf{w}^k, \bar{\boldsymbol{\lambda}}^k) \mathbf{v}_1 \right. \\ & \quad \left. - \exp(\lambda_1) \xi^k \limsup_{\substack{\mathbf{w} \mapsto \mathbf{w}^k, \mathbf{w} \in \mathcal{W} \\ s \downarrow 0, \mathbf{w} + s\mathbf{v}_2 \in \mathcal{W}}} \frac{\tilde{\phi}^{\circ}(\mathbf{w} + \mathbf{v}_2 s, \mu^k; \mathbf{v}_1; \mathcal{W}) - \tilde{\phi}^{\circ}(\mathbf{w}, \mu^k; \mathbf{v}_1; \mathcal{W})}{s} \right) \\ &= \nabla_{\mathbf{w}} f(\mathbf{w}^*, \boldsymbol{\lambda}^*)^T \mathbf{v}_2 - \xi^* \mathbf{v}_2^T \nabla_{\mathbf{w}}^2 g(\mathbf{w}^*, \bar{\boldsymbol{\lambda}}^*) \mathbf{v}_1 - \exp(\lambda_1) \xi^* \phi^{\circ\circ}(\mathbf{w}^*; \mathbf{v}_1, \mathbf{v}_2; \mathcal{W}) \\ &\geq 0 \end{aligned} \quad (65)$$

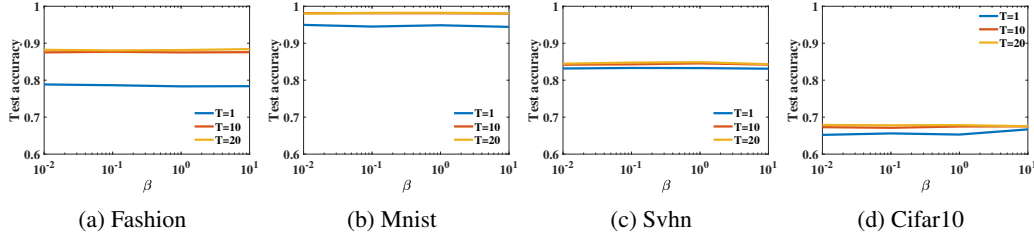

Figure 1: Test accuracy of data re-weight on dataset with different  $\beta$ . (Note the inner iteration number  $T$  is fixed.)

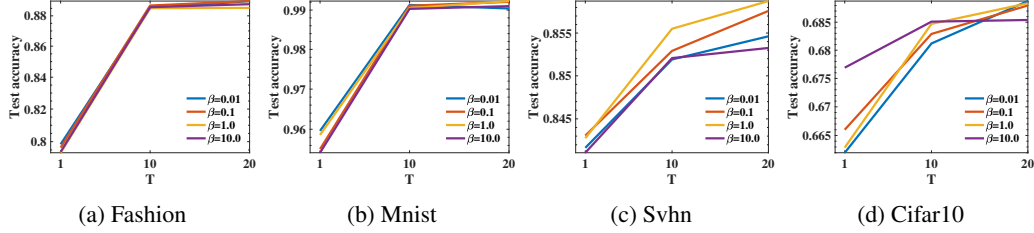

Figure 2: Test accuracy of data re-weight with different  $T$ . (Note the penalty parameter  $\beta$  is fixed.)

where

$$\phi^{\circ}(\mathbf{w}^*; \mathbf{v}_1, \mathbf{v}_2; \mathcal{W}) = \limsup_{\substack{\mathbf{w} \mapsto \mathbf{w}^*, \mathbf{w} \in \mathcal{W} \\ s \downarrow 0, \mathbf{w} + s\mathbf{v}_2 \in \mathcal{W}}} \frac{\phi^{\circ}(\mathbf{w} + \mathbf{v}_2 s; \mathbf{v}_1; \mathcal{W}) - \phi^{\circ}(\mathbf{w}; \mathbf{v}_1; \mathcal{W})}{s} \quad (66)$$

By using the same method, we can obtain

$$\nabla_{\lambda} f(\mathbf{w}^*, \lambda^*)^T \mathbf{v}_3 - \left( \bar{v}_3 \nabla_{\mathbf{w} \bar{\lambda}}^2 g(\mathbf{w}^*, \bar{\lambda}^*) \mathbf{v}_1 + v_3^1 e^{\lambda^*} \phi^{\circ}(\mathbf{w}^*; \mathbf{v}_1; \mathcal{W}) \right) \xi^* \geq 0 \quad (67)$$

for all  $\mathbf{v}_3 \in \mathcal{T}_{\mathcal{U}}(\lambda)$ .

That completes the proof.

This means that our method can converge to the stationary point the single-level problem 8. Meanwhile, it also means that our method will finally converge to the stationary point of the original bi-level problem.

## 2 IMPACT OF PENALTY PARAMETER AND INNER ITERATION NUMBER

In this section, we evaluate the impact of different initial values for penalty parameter  $\beta$  and the inner iteration number  $T$  in three applications. In data re-weight and training data poisoning, we use the deep neural network which has 3 convolution-maxpooling-relu layers and 3 dense layers. We randomly sample 3 layers to update  $\mathbf{w}$  and  $\lambda$  and data batch is fixed at 128. We run our method for 10 epochs. For meta-learning, we run our method for 1000 iterations. We present all the results in Figure 1, Figure 2, Figure 3, Figure 4, Figure 5, Figure 6, Figure 7, Figure 8 and Figure 9. From Figure 1, Figure 4 and Figure 7, we can find that the results do not change much when  $\beta$  is different and  $T$  is fixed. This means that our method is not insensitive to the initial value of  $\beta$ . We also present the running time and test accuracy in Figure 2, Figure 3, Figure 5, Figure 6, Figure 8 and Figure 9. In most cases, using a larger inner iteration number, we will get a better result. However, it needs a long running time for the large inner iteration number. In addition, when the number of inner iterations reaches a certain level, the accuracy improvement brought by increasing the number of iterations decreases.

Here we also discuss the effect of the different initial values of  $\eta_{\lambda}$  in three applications. In data re-weight and training data poisoning attack, we use the deep neural network which has 3 convolution-maxpooling-relu layers and 3 dense layers. We randomly sample 3 layers and 64 data samples to

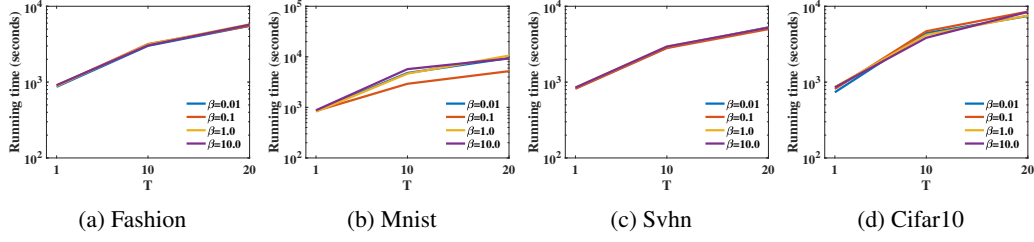Figure 3: Running time of data re-weight with different  $T$ . (Note the penalty parameter  $\beta$  is fixed.)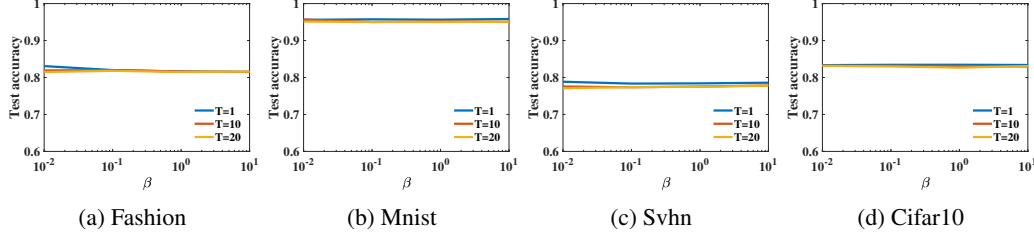Figure 4: Test accuracy of training data poisoning with different  $\beta$ . (Note the inner iteration number  $T$  is fixed.)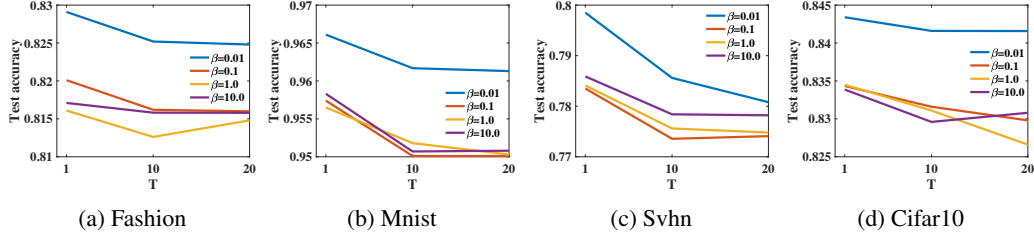Figure 5: Test accuracy of training data poisoning with different  $T$ . (Note the penalty parameter  $\beta$  is fixed.)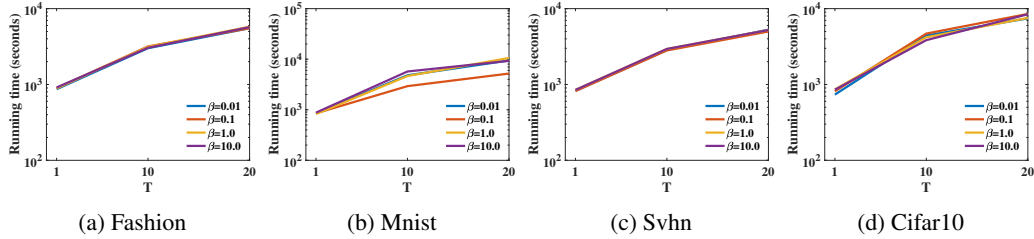Figure 6: Running time of training data poisoning with different  $T$ . (Note the penalty parameter  $\beta$  is fixed.)

calculate the stochastic gradient. We run our method for 20 epochs. For meta-learning, we run our method for 1000 iterations. We set  $\mu = 0.001$ ,  $\eta_w = 0.0001$ ,  $T = 10$  and  $\beta = 0.01$ . The results of using different  $\eta_\lambda$  are given in the following Tables 1, 2 and 3. Here we discuss the effect of different initial values of  $\mu$  in three applications. We set  $\eta_\lambda = 0.1$ ,  $\eta_w = 0.0001$ ,  $T = 10$  and  $\beta = 0.01$ . The results of using different  $\mu$  are given in the following Tables 4, 6 and 5.

From our results, we can find that our method is not sensitive to the initial values of the learning rate  $\eta_\lambda$  or the smoothing parameter  $\mu$ .

Table 1: Results of all the methods in data-reweighgt with different  $\eta_\lambda$ .

| <b>Name</b> | <b>0.1</b> | <b>0.01</b> | <b>0.001</b> |
|-------------|------------|-------------|--------------|
| Cifar10     | 0.683      | 0.682       | 0.685        |
| Svhn        | 0.844      | 0.845       | 0.842        |
| Mnist       | 0.984      | 0.983       | 0.984        |
| Fashion     | 0.881      | 0.879       | 0.878        |

Table 2: Results of all the methods in attack with different  $\eta_\lambda$ .

| <b>Name</b> | <b>0.1</b> | <b>0.01</b> | <b>0.001</b> |
|-------------|------------|-------------|--------------|
| Cifar10     | 0.494      | 0.503       | 0.493        |
| Svhn        | 0.777      | 0.773       | 0.774        |
| Mnist       | 0.959      | 0.961       | 0.959        |
| Fashion     | 0.829      | 0.828       | 0.831        |

Table 3: Results of all the methods in data-reweighgt with different  $\eta_\lambda$ .

| <b>Name</b>  | <b>Setting</b> | <b>0.1</b> | <b>0.01</b> | <b>0.001</b> |
|--------------|----------------|------------|-------------|--------------|
| Omnglot      | 5way-1shot     | 0.961      | 0.963       | 0.963        |
| Miniimagenet | 5way-1shot     | 0.448      | 0.447       | 0.448        |

Table 4: Results of all the methods in data reweight with different  $\mu$ .

| <b>Name</b> | <b>0.01</b> | <b>0.001</b> | <b>0.0001</b> |
|-------------|-------------|--------------|---------------|
| Cifar10     | 0.683       | 0.683        | 0.685         |
| Svhn        | 0.842       | 0.844        | 8.842         |
| Mnist       | 0.983       | 0.984        | 0.982         |
| Fashion     | 0.878       | 0.881        | 0.878         |

Table 5: Results of all the methods in data meta-learning with different  $\mu$ .

| <b>Name</b>  | <b>Setting</b> | <b>0.01</b> | <b>0.001</b> | <b>0.0001</b> |
|--------------|----------------|-------------|--------------|---------------|
| Omnglot      | 5way-1shot     | 0.962       | 0.961        | 0.963         |
| Miniimagenet | 5way-1shot     | 0.449       | 0.448        | 0.448         |

Table 6: Results of all the methods in data attack with different  $\mu$ .

| <b>Name</b> | <b>0.01</b> | <b>0.001</b> | <b>0.0001</b> |
|-------------|-------------|--------------|---------------|
| Cifar10     | 0.501       | 0.494        | 0.503         |
| Svhn        | 0.788       | 0.777        | 0.795         |
| Mnist       | 0.958       | 0.959        | 0.958         |
| Fashion     | 0.827       | 0.829        | 0.829         |

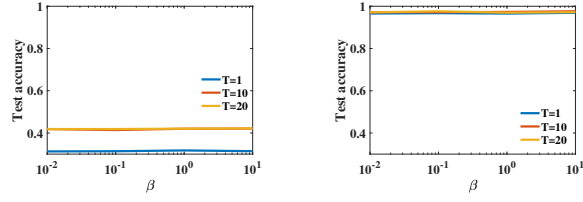

(a) Miniimagenet 5-way 1-shot (b) Omniglot 5-way 1-shot

Figure 7: Test accuracy of meta-learning with different  $\beta$ . (Note the inner iteration number  $T$  is fixed.)

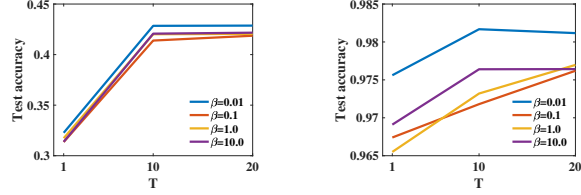

(a) Miniimagenet 5-way 1-shot (b) Omniglot 5-way 1-shot

Figure 8: Test accuracy of meta-learning with different  $T$ . (Note the penalty parameter  $\beta$  is fixed.)

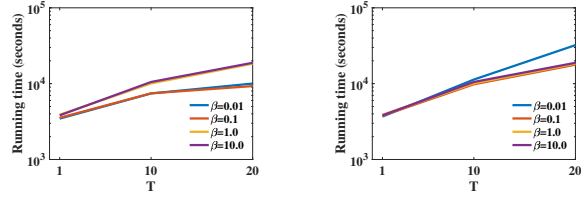

(a) Miniimagenet 5-way 1-shot (b) Omniglot 5-way 1-shot

Figure 9: Running time of meta-learning with different  $T$ . (Note the penalty parameter  $\beta$  is fixed.)

## REFERENCES

- Wei Bian and Xiaojun Chen. Optimality and complexity for constrained optimization problems with nonconvex regularization. *Mathematics of Operations Research*, 42(4):1063–1084, 2017.
- Frank H Clarke. A new approach to lagrange multipliers. *Mathematics of Operations Research*, 1(2): 165–174, 1976.
- Frank H Clarke. *Optimization and nonsmooth analysis*. SIAM, 1990.
- Stephan Dempe and Alain Zemkoho. *Bilevel optimization*. Springer, 2020.
